# Supplementary material
Source: bioRxiv or medRxiv preprint supplement (https://www.biorxiv.org/highwire/filestream/6027/field_highwire_adjunct_files/3/022889-12.pdf)

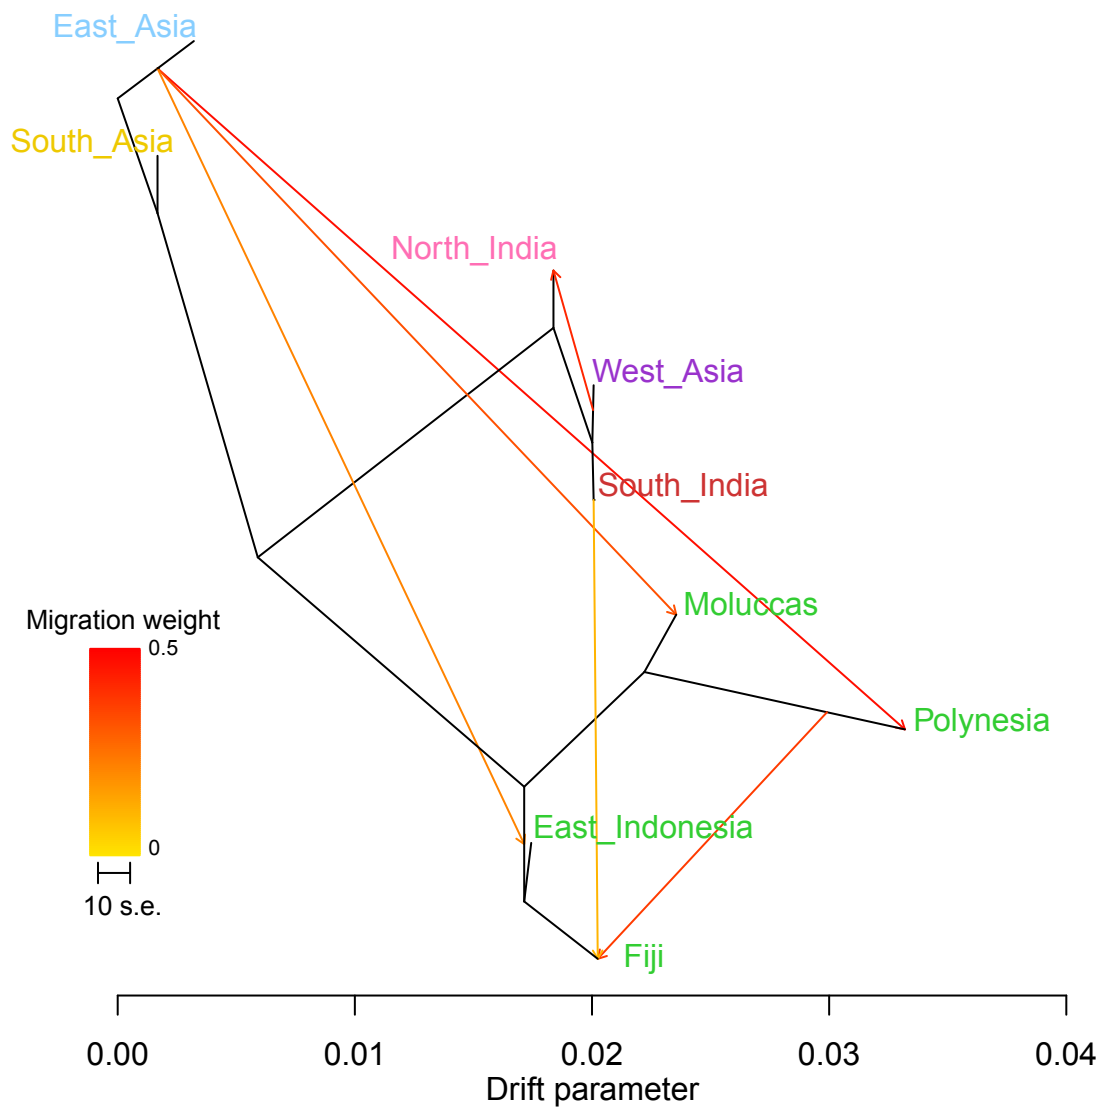

Supplement: Supplementary file [file 022889-12.pdf]
